# Supplementary material for: Exceptional damage-tolerance of a medium-entropy alloy CrCoNi at cryogenic temperatures
Source: PubMed Central journal article supplement (PMC4740901; doi:10.1038/ncomms10602), 2016-02-02
Supplement: ncomms10602-s1.pdf [file ncomms10602-s1.pdf]

# Supplementary Information

## Supplementary Table 1.

Mechanical properties of the CrCoNi medium-entropy alloy in the temperature range from room temperature to liquid nitrogen temperature. (Statistically significant data are shown as mean  $\pm$  standard deviation.)

|                                                       | 293 K           | 198 K           | 77 K            |
|-------------------------------------------------------|-----------------|-----------------|-----------------|
| Yield strength, $\sigma_y$ (MPa)                      | 440 $\pm$ 13    | 554 $\pm$ 24    | 657 $\pm$ 22    |
| Ultimate tensile strength, $\sigma_u$ (MPa)           | 884 $\pm$ 11    | 1053 $\pm$ 13   | 1311 $\pm$ 27   |
| Strain to failure, $\epsilon_f$ (-)                   | 0.73 $\pm$ 0.01 | 0.68 $\pm$ 0.09 | 0.90 $\pm$ 0.02 |
| Strain hardening exponent, $n$                        | 0.40 $\pm$ 0.01 | 0.40 $\pm$ 0.00 | 0.40 $\pm$ 0.01 |
| Young's modulus, $E$ (GPa)                            | 229             | 235             | 241             |
| Work of fracture (MJ/m <sup>2</sup> )                 | 3.5 $\pm$ 0.1   | 3.9 $\pm$ 0.5   | 6.4 $\pm$ 0.3   |
| Fracture toughness, $K_{JIC}$ (MPa.m <sup>1/2</sup> ) | 208 $\pm$ 25    | 265 $\pm$ 34    | 273 $\pm$ 32    |
| Crack growth toughness* (MPa.m <sup>1/2</sup> )       | 350 $\pm$ 50    | 402 $\pm$ 21    | 404 $\pm$ 44    |

\* at crack extension of  $\Delta a = 2.25$  mm.
